# Supplementary material for: Recapitulating and Correcting Marfan Syndrome in a Cellular Model
Source: PubMed Central journal article supplement — Int J Biol Sci. 2017 Apr 10;13(5):588–603. doi: 10.7150/ijbs.19517 (PMC5441176; doi:10.7150/ijbs.19517), 2017-04-10

## Supplemental Information

### Recapitulating and correcting Marfan syndrome in a cellular model

Jung Woo Park, Li Yan, Chris Stoddard, Xiaofang Wang, Zhichao Yue, Leann Crandall, Tiwana Robinson, Yuxiao Chang, Kyle Denton, Enqin Li, Bin Jiang, Zhenwu Zhang, Kristen Martins-Taylor, Siu-Pok Yee, Hong Nie, Feng Gu, Wei Si, Ting Xie, Lixia Yue, Ren-He Xu

**Table S1.** Primers used in this study

| Primer Name                                | Sequence              |
|--------------------------------------------|-----------------------|
| For detecting FBN1 mutation (Fig. 1E)      |                       |
| mut-HphI-F                                 | AATGTCAGCTTTTCTGCAA   |
| mut-HphI-R                                 | CCAGGGAAGCAACACAAACT  |
|                                            |                       |
| For verifying genome targeting (Fig. 2)    |                       |
| F1                                         | CCTATGCAATCGCAGAAACA  |
| R1                                         | GCTGCATATTTCTCCCTGTG  |
| F2                                         | TGCTCCTGCCGAGAAAGTAT  |
| R2                                         | TGGCATTCCAAAAGATAGCA  |
| F3                                         | GAACAGCCCAGGCTCTTTTA  |
| R3                                         | TGCAGCCCAATTCCGATCAT  |
| F4                                         | CTTCTGAGGCGGAAAGAACCA |
| R4                                         | GAACCACAGCATGGGTTTCT  |
|                                            |                       |
| For conducting RT-(q)PCR (Figs. 4C and 6D) |                       |
| ACTA2-F                                    | AGAATCCTGTGAAGCAGCTC  |
| ACTA2-R                                    | CTTTTCCATGTCGTCCCAGT  |
| VE-CAD-F                                   | ACTGGGGACCCAGGTTTAAG  |
| VE-CAD-R                                   | TGGAGTTTGCTATCCCAAGG  |
| GAPDH-F                                    | ACCACAGTCCATGCCATCAC  |
| GAPDH-R                                    | TCCACCACCCTGTTGCTGTA  |
| MYH11-F                                    | GACCCAGATGGAGGAGATGA  |
| MYH11-R                                    | GTAGCTGCTTGATGGCTTCC  |
| SMMHC-F                                    | GGAGGATGAGATCCTGGTCA  |

|                                                                                      |                            |
|--------------------------------------------------------------------------------------|----------------------------|
| SMMHC-R                                                                              | TTAGCCGCACTTCCAGTTCT       |
| SMTN-F                                                                               | GCTGAGGAGCTGATGACTAT       |
| SMTN-R                                                                               | CTCCTTCTCCAGCTTCTCAA       |
| IL8-F                                                                                | CAGTTTTGCCAAGGAGTGCT       |
| IL8-R                                                                                | ACTTCTCCACAACCCTCTGC       |
| IL1B-F                                                                               | GGAGAATGACCTGAGCACCT       |
| IL1B-R                                                                               | GGAGGTGGAGAGCTTTCAGT       |
| COL12A1-F                                                                            | ATCTCTGTTATACGCCGGGG       |
| COL12A1-R                                                                            | TGCAATCCCTCTCTGCAGA        |
| COL8A2-F                                                                             | AGCACTCTTCCCTTTCTCCC       |
| COL8A2-R                                                                             | CCCACAGATGAACCCCTCTT       |
|                                                                                      |                            |
| For verifying the transgene silencing (Fig S1)                                       |                            |
| F1                                                                                   | AGTGAGAGGCAACCTGGAGA       |
| R1                                                                                   | CACCTGCAAGTTTCAGCAAA       |
| F2                                                                                   | TTGCTGAAACTTGCAGGTG        |
| R2                                                                                   | GCAGAGCGTCGCTAGCCAT        |
| F3                                                                                   | ACCAGCTCGCAGACCTACAT       |
| R3                                                                                   | ACATCCCCTGCTTGTTTCAA       |
| F4                                                                                   | TTGAAACAAGCAGGGGATGT       |
| R4                                                                                   | CAGCAGCTCGAATTTCTTCC       |
| F5                                                                                   | GACAGGGGGAGGGGAGGAGCTAGG   |
| R5                                                                                   | CTTCCCTCCAACCAGTTGCCCAAAC  |
| F6                                                                                   | GGGAAATGGGAGGGGTGCAAAAGAGG |
| R6                                                                                   | TTGCGTGAGTGTGGATGGGATTGGTG |
|                                                                                      |                            |
| For T7E1 assay to validate the site-specific cleavage in exon 24 of <i>FBN1</i> gene |                            |
| Forward                                                                              | AGTCCATGCTGGGATGATCAAG     |
| Reverse                                                                              | CATGCACGCATCGGTGATAG       |
|                                                                                      |                            |
| For confirmation of the <i>FBN1</i> knockout                                         |                            |
| P1-Forward                                                                           | CGTGCACCCTATGCCAAGTT       |
| P1-Reverse                                                                           | GCATTCTCAGTACCCAGG         |
| P2-Forward                                                                           | TGAAGTGTTCCAGGAGTGTG       |
| P2-Reverse                                                                           | AATCAAGAGCAAAGCCGCTG       |

## Figure legend

**Figure S1.** Validation of MFS- and mcMFS-iPSCs. (a) RT-PCR analysis to determine the silencing of the transgenes using primers as shown in the schematic. (b) Pluritest. \*Another MFS-iPSC line, different from Figure 1b. (c) Immunocytochemistry for pluripotency markers. Scale bars, 100  $\mu$ M.

**Figure S2.** Analysis of the microarray data on MFS- and mcMFS-SMCs. (a-b) Scatter plots for comparison of probe intensities between the different samples to analyze the overall inter-sample variance. (c) A volcano plot demonstrating numbers of differentially expressed genes between the two groups. (d-f) Comparison between the two groups for transcript of *FBN1* (d), collagens (e), and inflammation-related genes (f).

**Figure S3.** Characterization of ENVY-C1 hESCs that had *FBN1* knockout in both alleles. (a) Immunostaining for pluripotency markers in ENVY-C1 hESCs. Scale bars, 100  $\mu$ M. (b) Schematic and analysis for detecting the *FBN1* transcripts near the targeted sites in ENVY-C1 hESCs using RT-PCR with primers as indicated.

Figure S1 Park et al.

Top

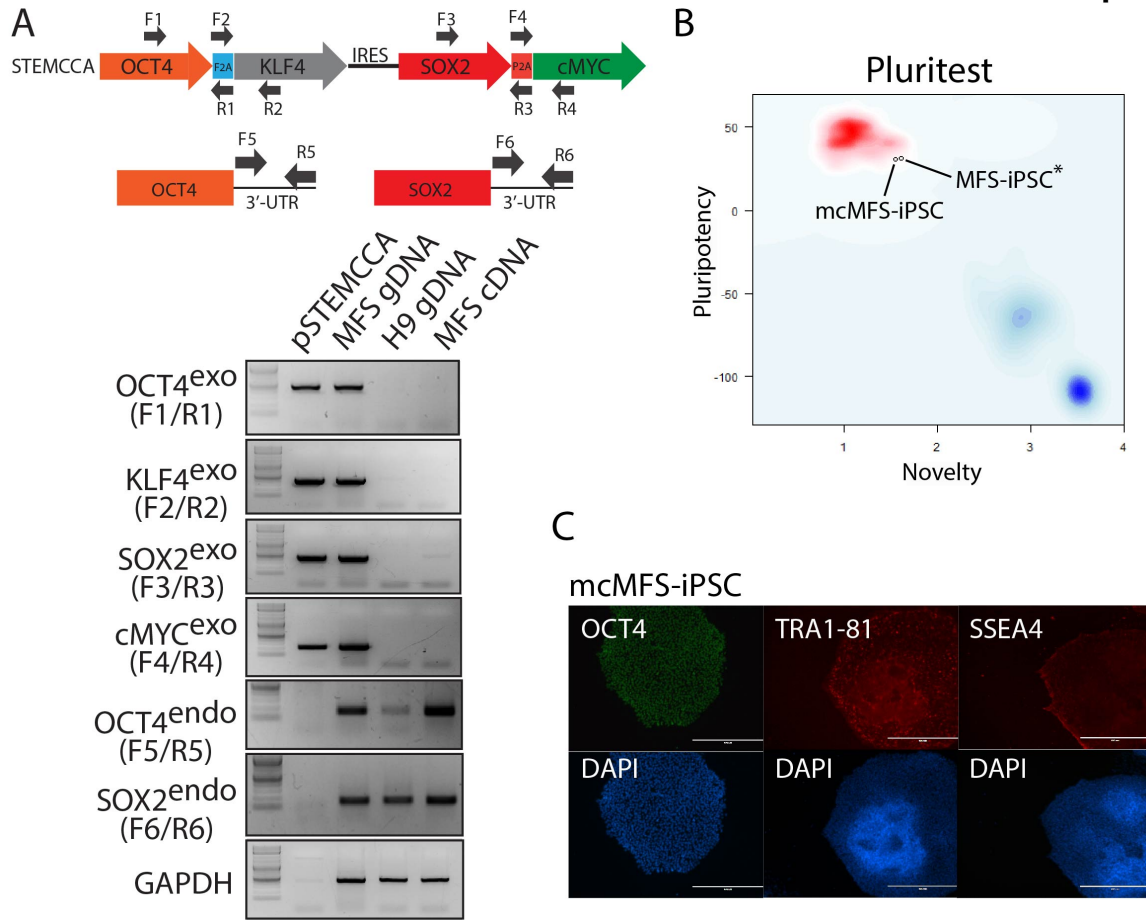

Figure S2 Park et al.

Top

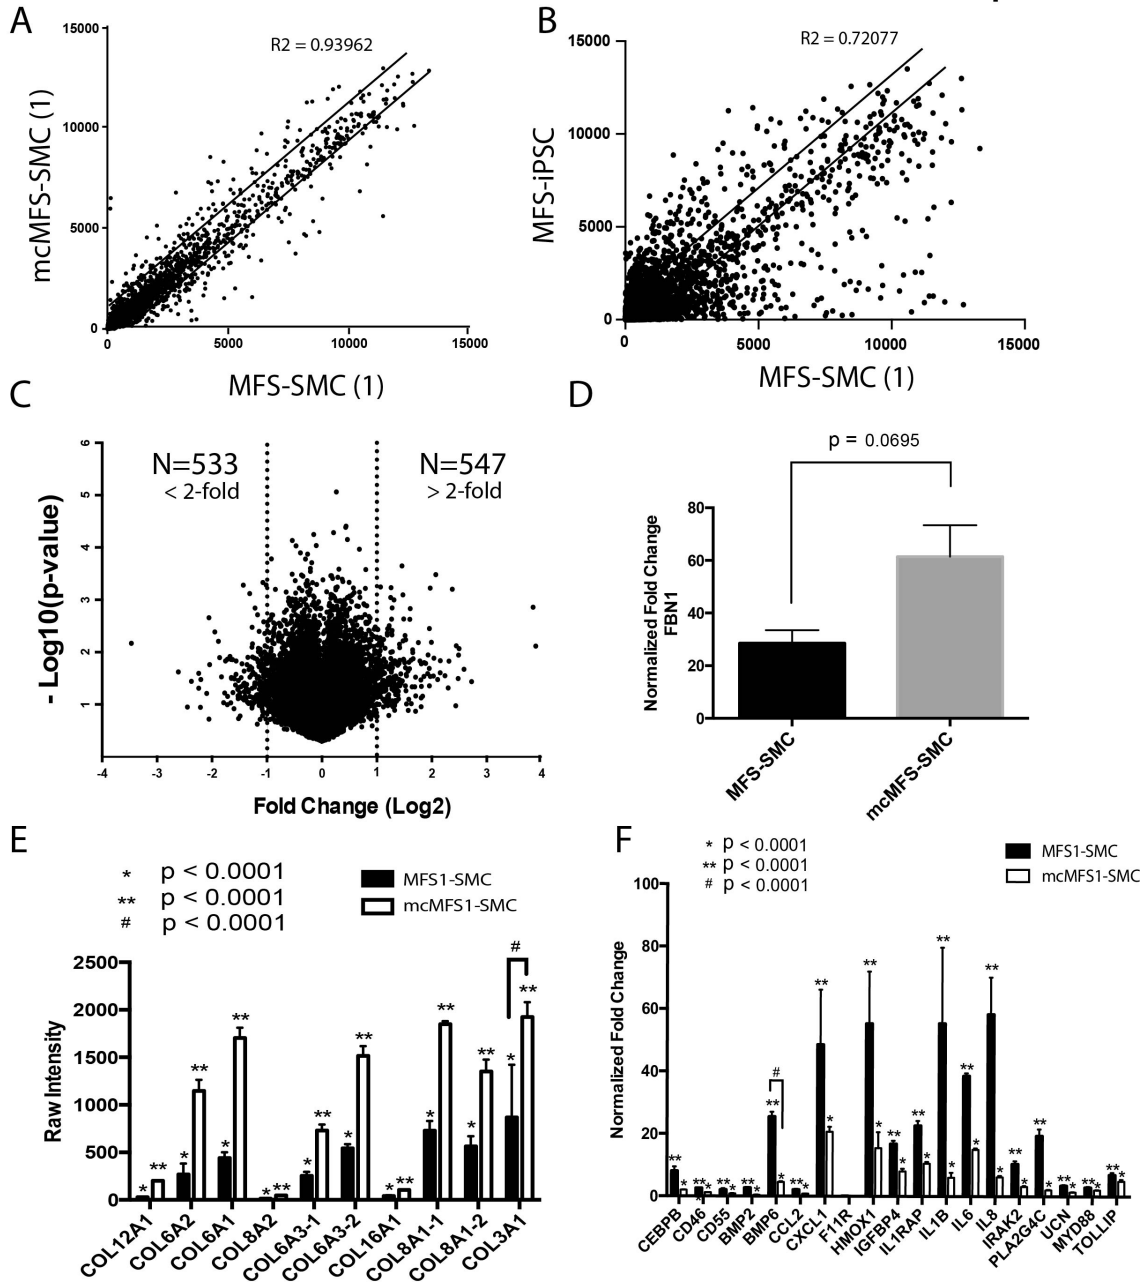

Figure S3 Park et al.

Top

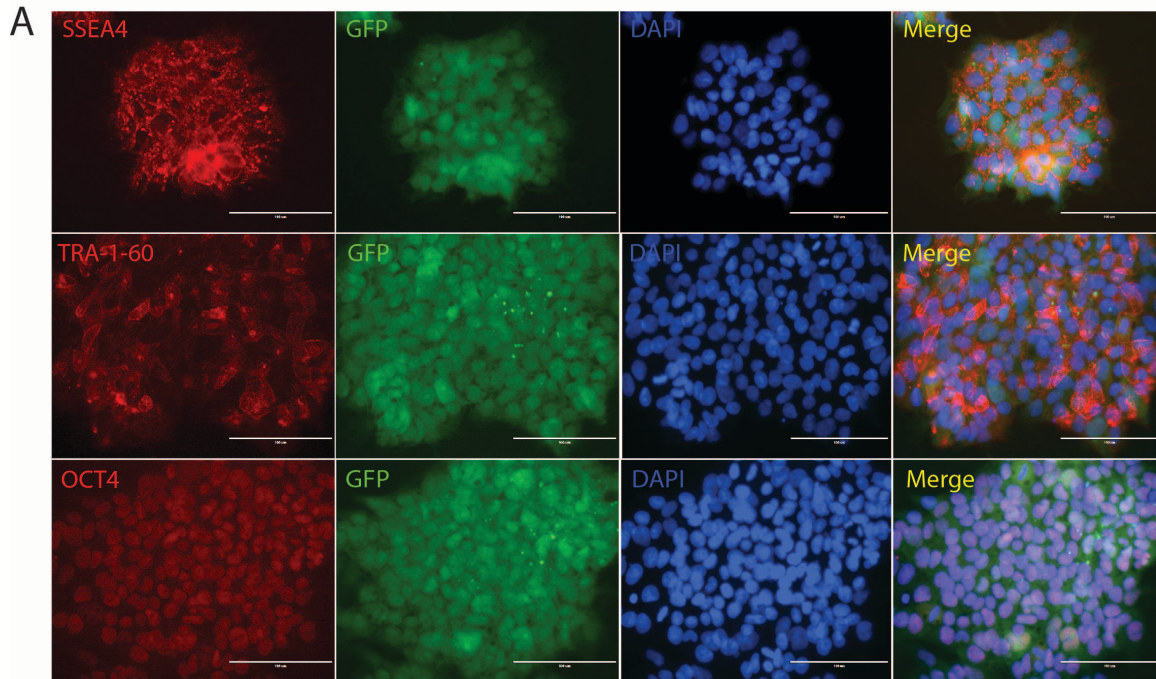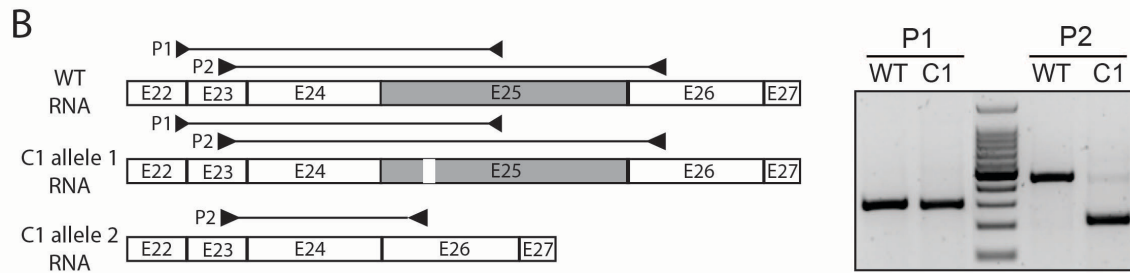

Supplement: ijbsv13p0588s1.pdf [file ijbsv13p0588s1.pdf]
